# Supplementary material
Source: Research Square preprint supplement (doi:10.21203/rs.3.rs-9650796/v1)
Supplement: Supplementary file 1 [file ad95b2165e7501fb4657f445.pdf]

1 ***Supporting information of***

2

3 **Warming shifts surface ozone peak to higher temperatures**

4 Haolin Wang<sup>1,2,3,6</sup>, Shuai Li<sup>1,3</sup>, Haofan Wang<sup>1,3</sup>, Funing Li<sup>4</sup>, Aiguo Dai<sup>5</sup>, Arlene M. Fiore<sup>4</sup>, Paul I.  
5 Palmer<sup>6,7</sup>, Drew T. Shindell<sup>8</sup>, Seok-Woo Son<sup>9</sup>, Haichao Wang<sup>1,3</sup>, Kai Wu<sup>10</sup>, Ke Li<sup>11</sup>, Shaojia Fan<sup>1,3</sup>,  
6 Gregory R. Carmichael<sup>12</sup>, Xiao Lu<sup>1,3\*</sup>, Meng Gao<sup>2\*</sup>

7 <sup>1</sup> School of Atmospheric Sciences, Sun Yat-sen University, and Southern Marine Science and  
8 Engineering Guangdong Laboratory (Zhuhai), Zhuhai, Guangdong, China

9 <sup>2</sup> Department of Geography, Hong Kong Baptist University, Hong Kong, China

10 <sup>3</sup> Guangdong Provincial Observation and Research Station for Climate Environment and Air Quality  
11 Change in the Pearl River Estuary, Zhuhai, Guangdong, China

12 <sup>4</sup> Department of Earth, Atmospheric, and Planetary Sciences, Massachusetts Institute of Technology,  
13 Cambridge, MA, USA.

14 <sup>5</sup> Department of Atmospheric and Environmental Sciences, University at Albany, State University of  
15 New York, Albany, NY, USA

16 <sup>6</sup> School of GeoSciences, University of Edinburgh, Edinburgh, United Kingdom

17 <sup>7</sup> National Centre for Earth Observation, University of Edinburgh, Edinburgh, United Kingdom

18 <sup>8</sup> Nicholas School of the Environment, Duke University, Durham, NC, USA

19 <sup>9</sup> School of Earth and Environmental Sciences, Seoul National University, Seoul, Republic of Korea

20 <sup>10</sup> Department of Civil and Environmental Engineering, University of California, Irvine, CA, USA

21 <sup>11</sup> State Key Laboratory of Climate System Prediction and Risk Management/Joint International  
22 Research Laboratory of Climate and Environment Change, School of Environmental Science and  
23 Engineering, Nanjing University of Information Science & Technology, Nanjing, China

24 <sup>12</sup> College of Engineering, University of Iowa, Iowa City, IA, USA

25 **Correspondence:** Xiao Lu (luxiao25@mail.sysu.edu.cn) and Meng Gao (mmgao2@hkbu.edu.hk)

|    |                              |
|----|------------------------------|
| 26 | <b>Contents</b>              |
| 27 | Supplementary Text S1-S2     |
| 28 | Supplementary Figures S1-S18 |
| 29 | Supplementary Tables S1-S3   |
| 30 | References                   |

## 31 **Supplementary Text S1 | Data description**

32 Nationwide hourly measurements of ground-level ozone and CO from ~2000 urban monitoring  
33 stations across China for 2015–2019 were obtained from the China National Environmental  
34 Monitoring Center (CNEMC). Concurrent hourly ozone and CO measurements for 2015–2019 in  
35 Europe and 1980-2022 in the United States were sourced from the European Environment Agency  
36 (EEA) and the EPA Air Quality System (AQS), respectively, while data for South Korea (2015-2019)  
37 and Japan (1980-2022) were obtained from the Korean Ministry of Environment and the National  
38 Institute for Environmental Studies. We performed data quality control on the hourly surface data by  
39 following our previous guidelines to exclude unreliable data outliers<sup>1</sup>. A minimum of 18 valid hourly  
40 observations per day was required to ensure robust calculation of the daily maximum 1-hour average  
41 (MDA1) ozone. Only sites with valid ozone data for at least 60% of summer days ( $\geq 276$  of 460 days)  
42 were included to derive a robust ozone-temperature relationship. To facilitate a consistent analysis of  
43 inter-species co-variations, only sites with collocated and temporally matched CO and ozone  
44 measurements were selected for Figure S14, including 1,397 sites in China, 55 in Japan, 310 in South  
45 Korea, 552 in Europe, and 194 in the United States.

46

## 47 **Supplementary Text S2 | Comparison of methods for estimating the cut-off temperature of** 48 **ozone suppression**

49 Some previous studies identified “ozone suppression” at high temperatures, based on changes in  
50 ozone-temperature slopes across different temperature bins<sup>2-4</sup>. For example, Steiner et al. (2010)  
51 defined ozone suppression using a one-tailed Z test to evaluate if  $m_{O_3-T}$  within an “extremely high”  
52 temperature regime is significantly less than that within a “normal” temperature regime at a 95%  
53 confidence level<sup>2</sup>. The “cutoff temperature” is defined as the temperature resulting in the most  
54 significantly different  $m_{O_3-T}$  between the normal temperature and the extremely high temperature  
55 slopes. While both our study and previous work address the suppression of ozone increases at extreme  
56 temperatures, the goals and methods are different. “Suppression” defined in previous studies includes  
57 both a deceleration in the rate of ozone increase and a complete reversal (*i.e.*, a transition from increase  
58 to decrease) with increasing temperature. In contrast, our study focuses exclusively on the reversal of  
59 ozone-temperature relationship. Our study aims to explicitly identify the temperature hosting the  
60 highest ozone concentrations, as these extreme levels pose the greatest risks to air quality and public  
61 health. Consequently, the corresponding reversal temperature (*i.e.*, peak-ozone temperature) serves as  
62 the key metric. Although our definition of ozone-temperature relationship reversal (described in  
63 Methods) does not rely on statistical tests, the robustness of our approach is ensured by using a 5-year  
64 observation window, and by excluding temperature bins with insufficient records.

65 Figure S2 exemplifies the difference between the two methods. At two selected sites in China, we  
66 can identify ozone peaks at a specific temperature bin (305K for site 1880A and 308K for site 2478A,  
67 defined as peak-ozone temperature), beyond which ozone concentrations decrease. This pattern

68 demonstrates a clear reversal in the ozone-temperature relationship. Investigating the drivers behind  
69 the decrease from these peak temperatures is the primary focus of our study. However, neither site is  
70 classified as exhibiting “ozone suppression” based on the Z-test. This is because ozone observations  
71 beyond the peak temperature are typically sparse (often fewer than 100 data points), in sharp contrast  
72 to the thousands of observations available within the normal temperature range. This imbalance in  
73 sample size limits the statistical power required to pass the Z-test, potentially resulting in the loss of  
74 valuable samples for analyzing ozone responses at high temperatures.

75 We evaluated the sensitivity of the diagnosed peak-ozone temperature to the choice of ozone  
76 percentiles (75<sup>th</sup>, 85<sup>th</sup>, and 95<sup>th</sup>) within each temperature bin, and compared these results with the  
77 “cutoff temperature” determined by the Z-test approach for identifying “ozone suppression” (Fig. S3).  
78 Overall, the probability density functions of peak-ozone temperatures derived from different  
79 percentiles remain largely consistent, with regional mean differences of less than 0.8 K. However,  
80 utilizing lower ozone percentiles reduces the number of sites identified as exhibiting an ozone-  
81 temperature reversal. The proportion of sites classified as showing “ozone suppression” via the Z-test  
82 ranges from 38.1% to 49.3% across the five regions, consistent with previous studies in China<sup>4</sup>.  
83 Notably, more than 68% of the sites identified by the Z-test are also captured by our method for  
84 detecting ozone-temperature reversal, despite the differing objectives of the two approaches. The  
85 derived 'cutoff' temperatures are similar to the peak-ozone temperatures in China but show larger  
86 discrepancies in the other regions.

87

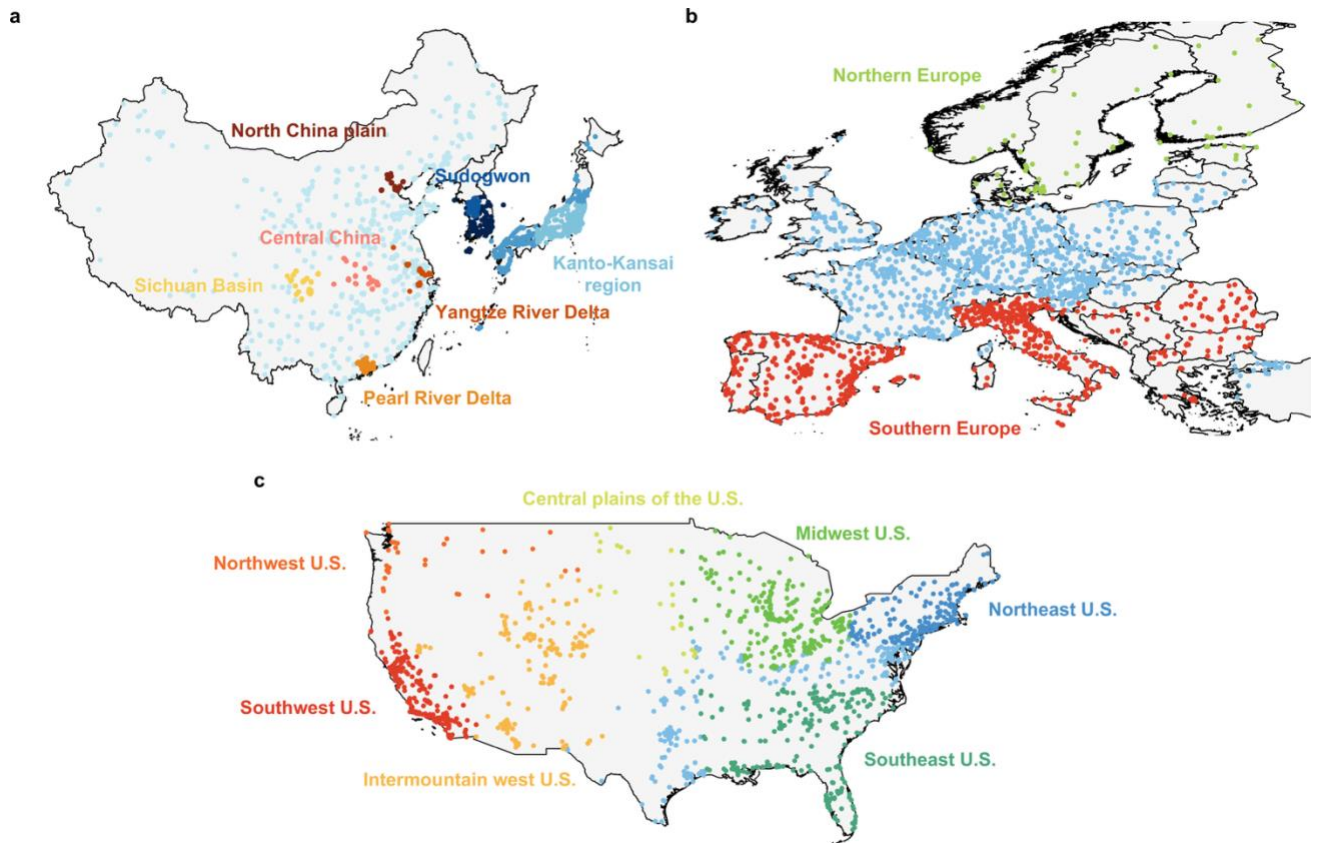

88

89 **Supplementary Figure S1 | Locations of ozone monitoring sites over 2015–2019 used in this**  
 90 **study.**

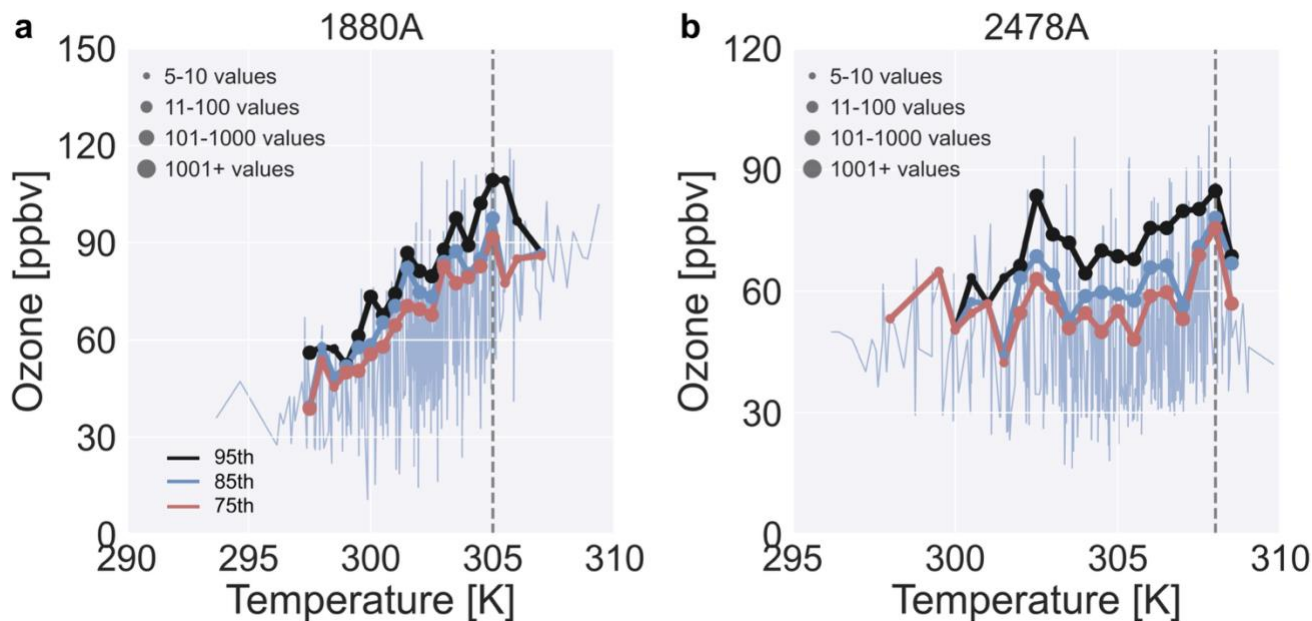

91

92 **Supplementary Figure S2 | Examples of sites exhibiting ozone-temperature relationship**  
 93 **reversal not captured by the Z-test method. Ozone-temperature relationships at two sites in**  
 94 **China are shown. The colored lines indicate the 95<sup>th</sup>, 85<sup>th</sup>, and 75<sup>th</sup> percentiles of ozone within**  
 95 **each bin (0.5K intervals). Vertical grey dashed lines indicate the peak-ozone temperature.**  
 96 **Despite displaying a clear ozone-temperature relationship reversal, these sites were not identified**  
 97 **as significant by the Z-test method<sup>2-4</sup>.**

98

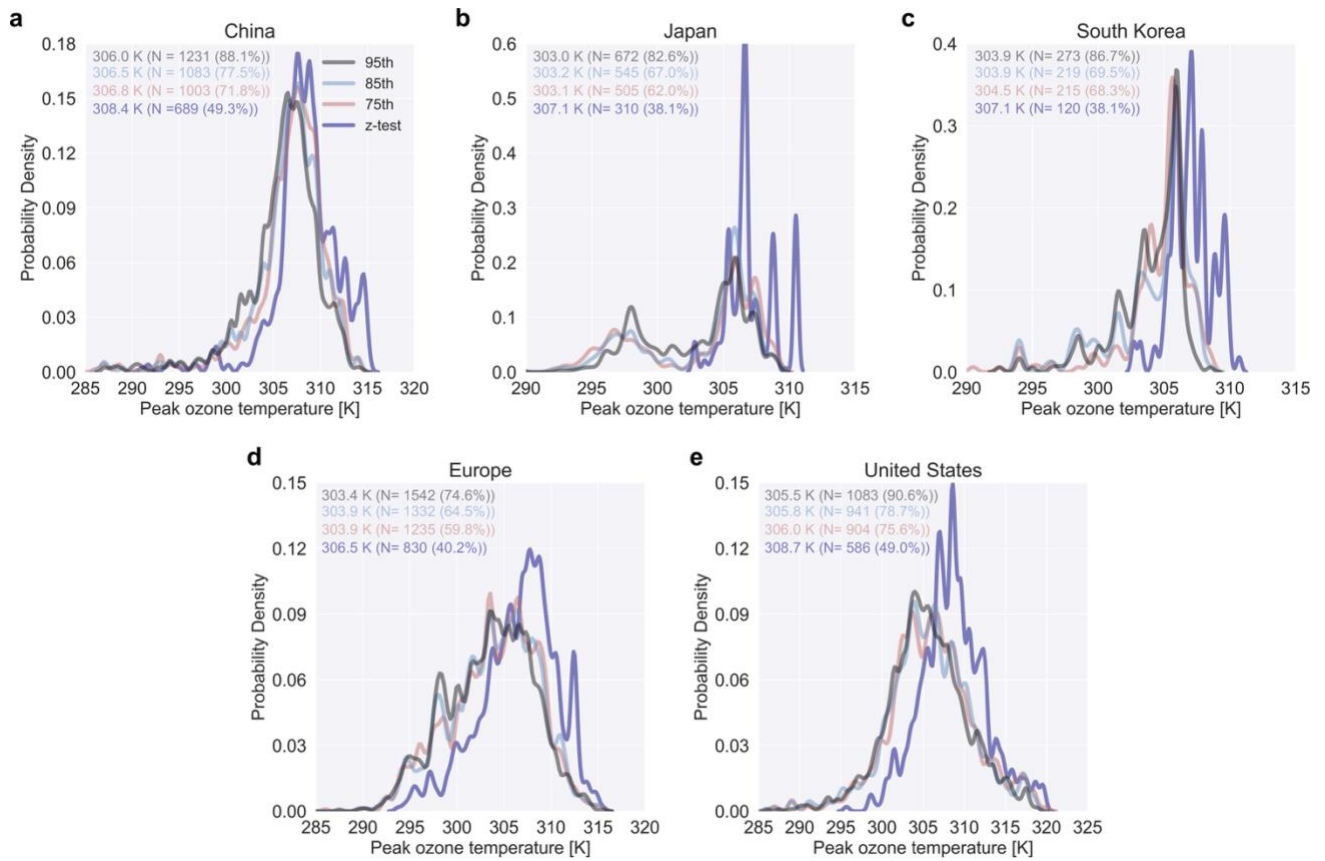

99

100

101

102

103

104

105

106

**Supplementary Figure S3 | Comparison of peak-ozone temperature distributions derived from different percentiles at each temperature bins with the cutoff temperature derived from the Z-test approach. Probability density functions of temperature for five regions—China (CHN), Japan (JP), South Korea (Kr), Europe (EU), and the United States (US) are shown. The texts in each panel list the regional mean peak-ozone temperature or cutoff temperature, the number of valid sites, and the proportion of sites relative to the total.**

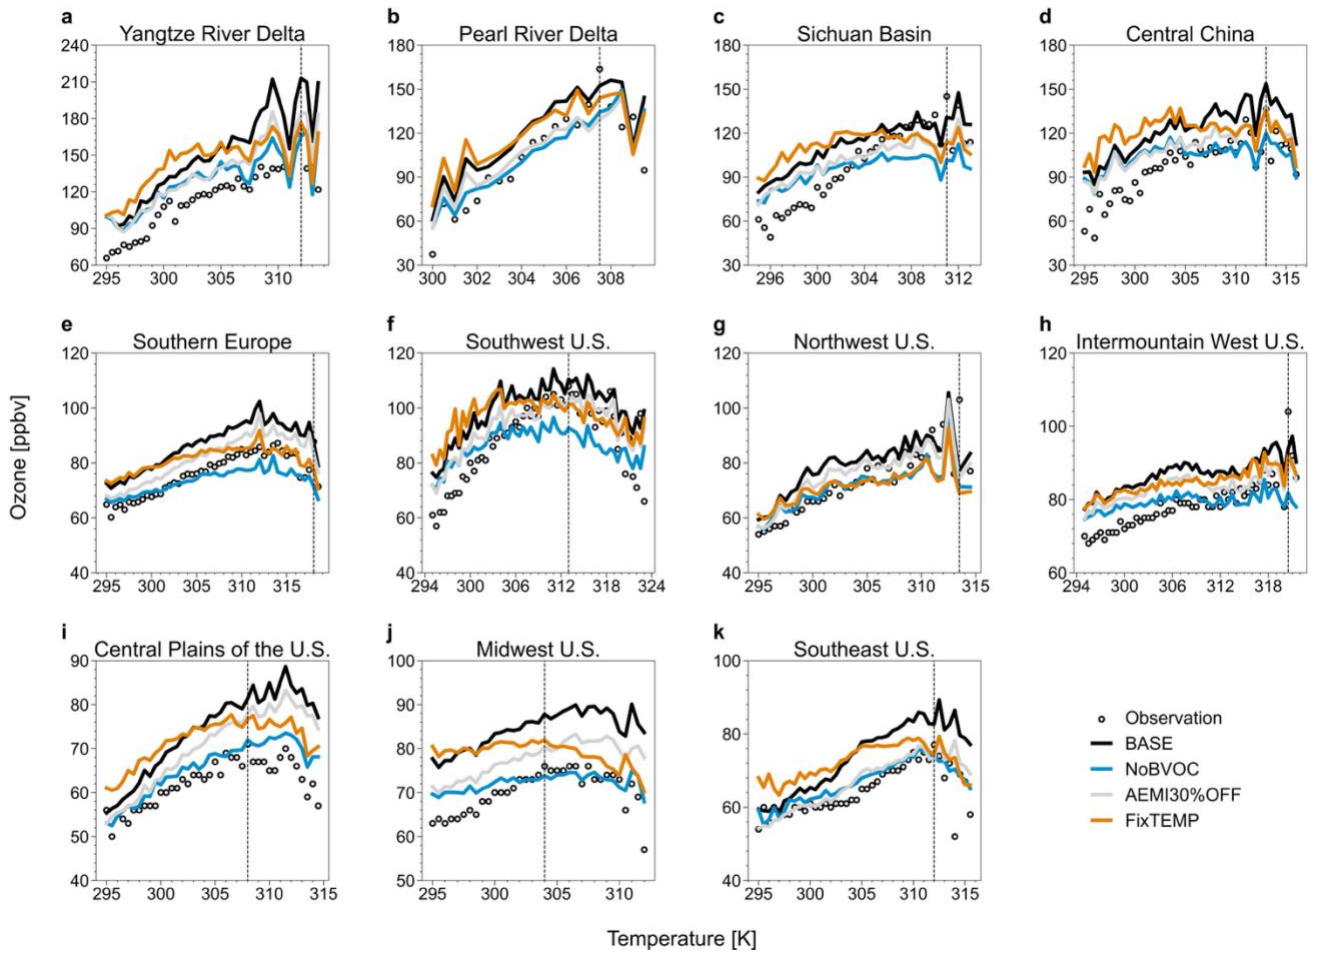

107

108 **Supplementary Figure S4 | Same as Figure 2a but for key regions within China, Europe, and**

109 **the United States.**

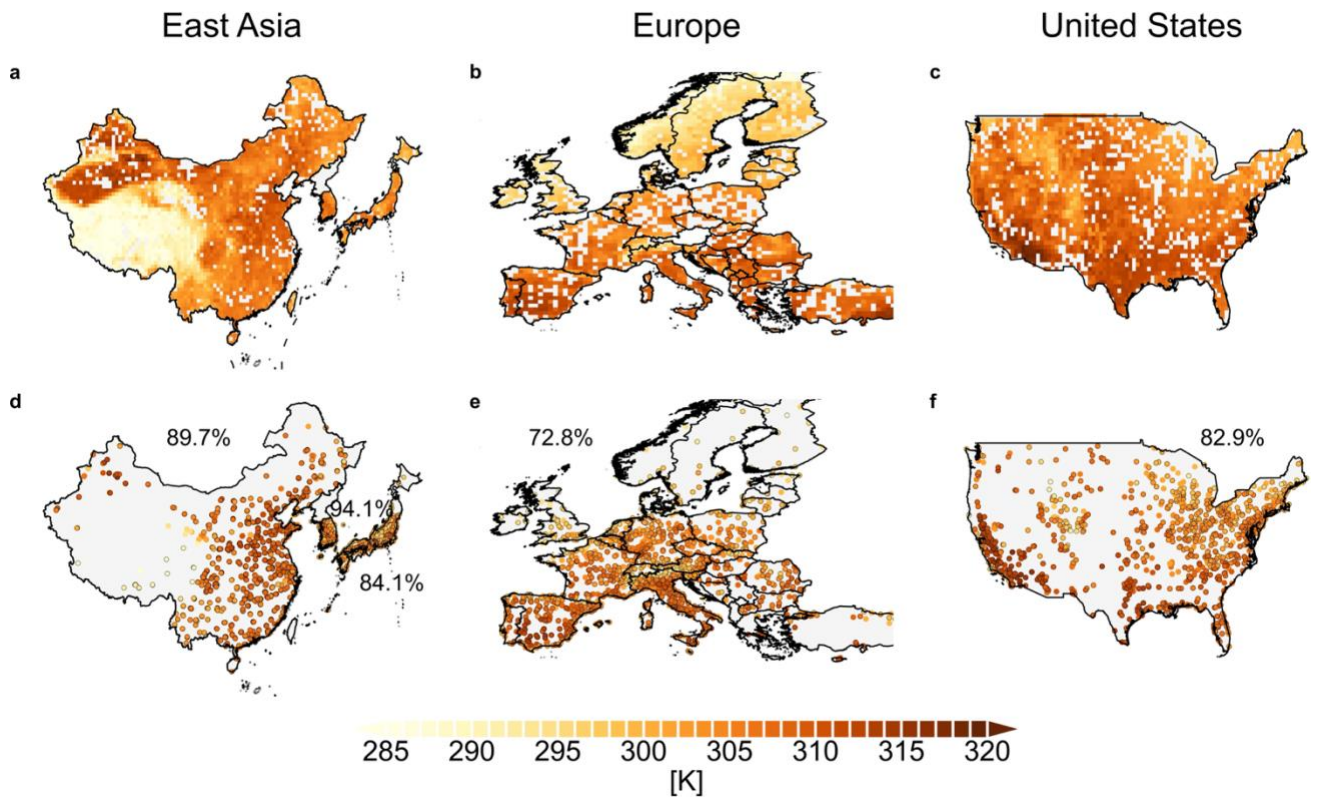

110

111 **Supplementary Figure S5 | GEOS-Chem simulated and observed peak-ozone temperatures**  
 112 **across East Asia, Europe, and the United States. The first row shows simulated results, and the**  
 113 **second row shows observed results. Circles with black edges indicate sites where the model**  
 114 **captures observed ozone-temperature reversal. The percentage of sites within each region where**  
 115 **the model captures the observed ozone-temperature reversal is shown as an inset.**

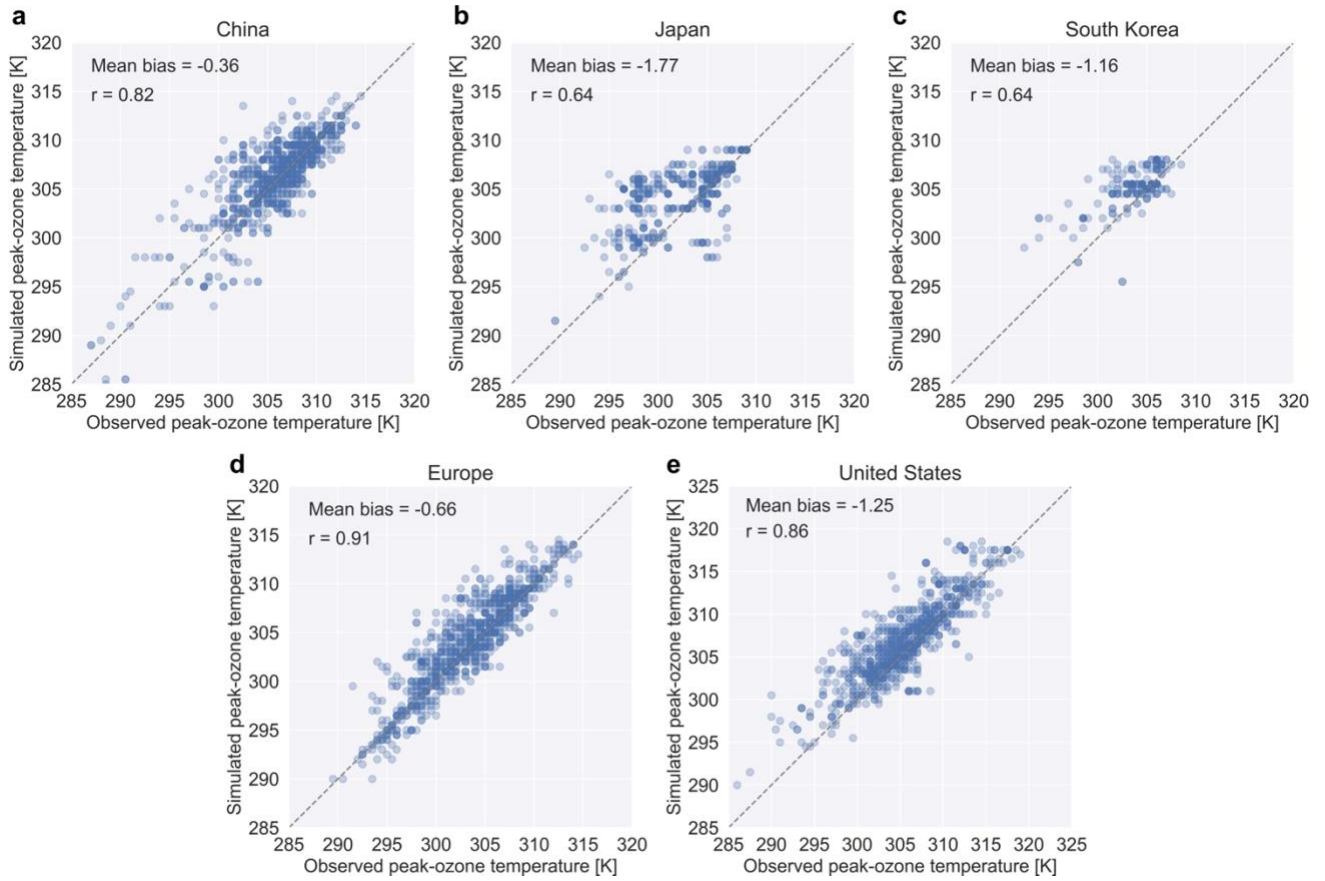

116

117 **Supplementary Figure S6 | Comparison between observed (x-axis) and GEOS-Chem simulated**  
 118 **(y-axis) peak-ozone temperatures over China, Japan, Korea, Europe, and the United States.**

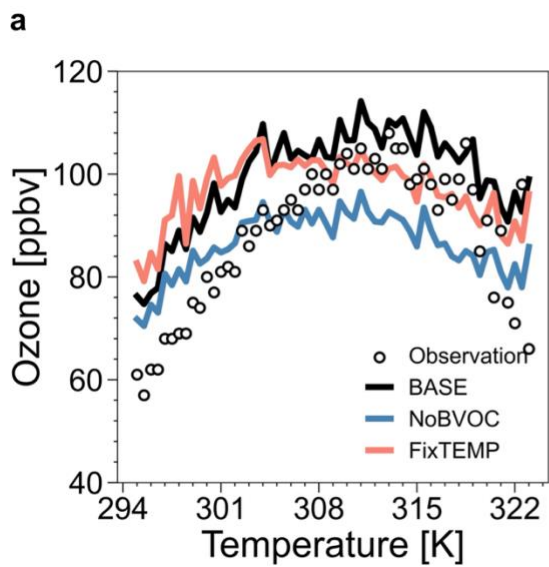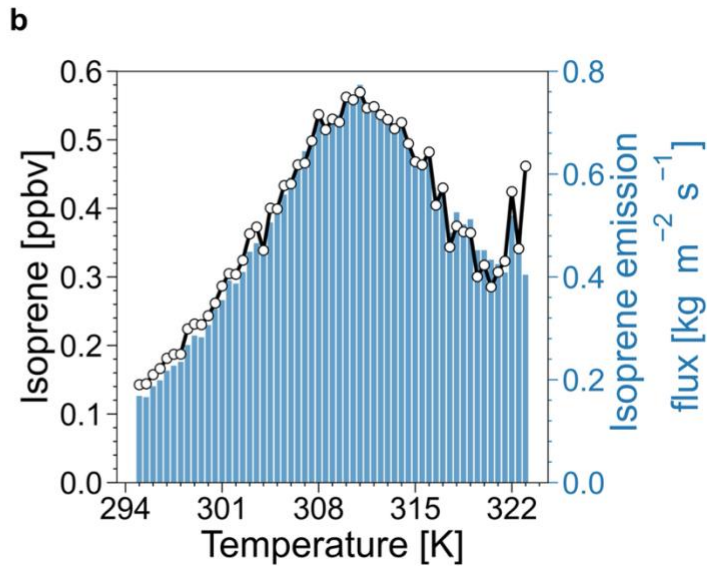

119

120

121

122

**Supplementary Figure S7 | Ozone–temperature and isoprene–temperature relationships in the Southwest United States (California). (a) Same as Figure S4. (b) Response of simulated isoprene concentration (black lines) and emission fluxes (blue bars) with increased temperature.**

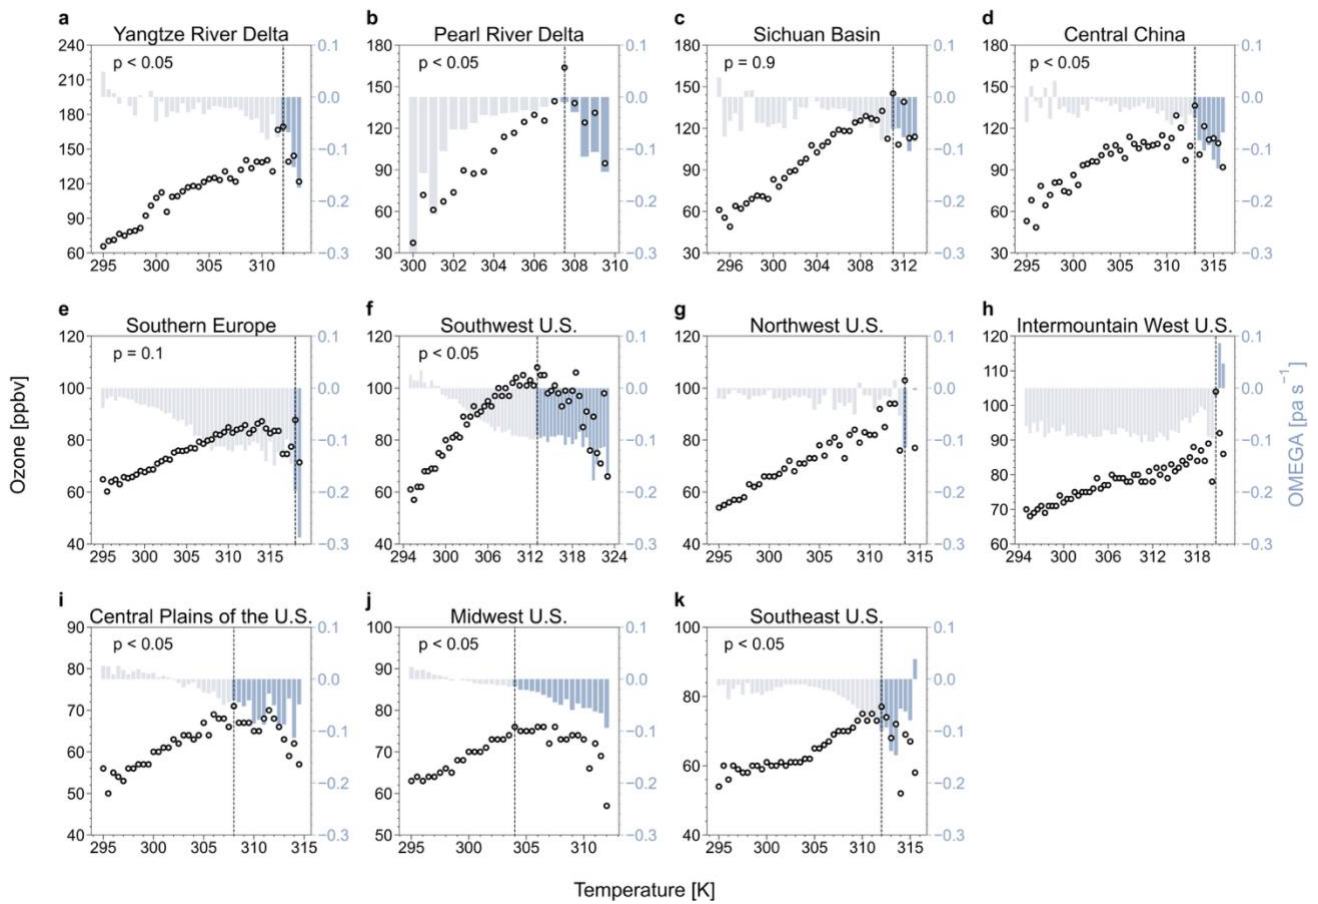

123

124

125

**Supplementary Figure S8 | Same as Figure 2b but for key regions within China, Europe, and the United States.**

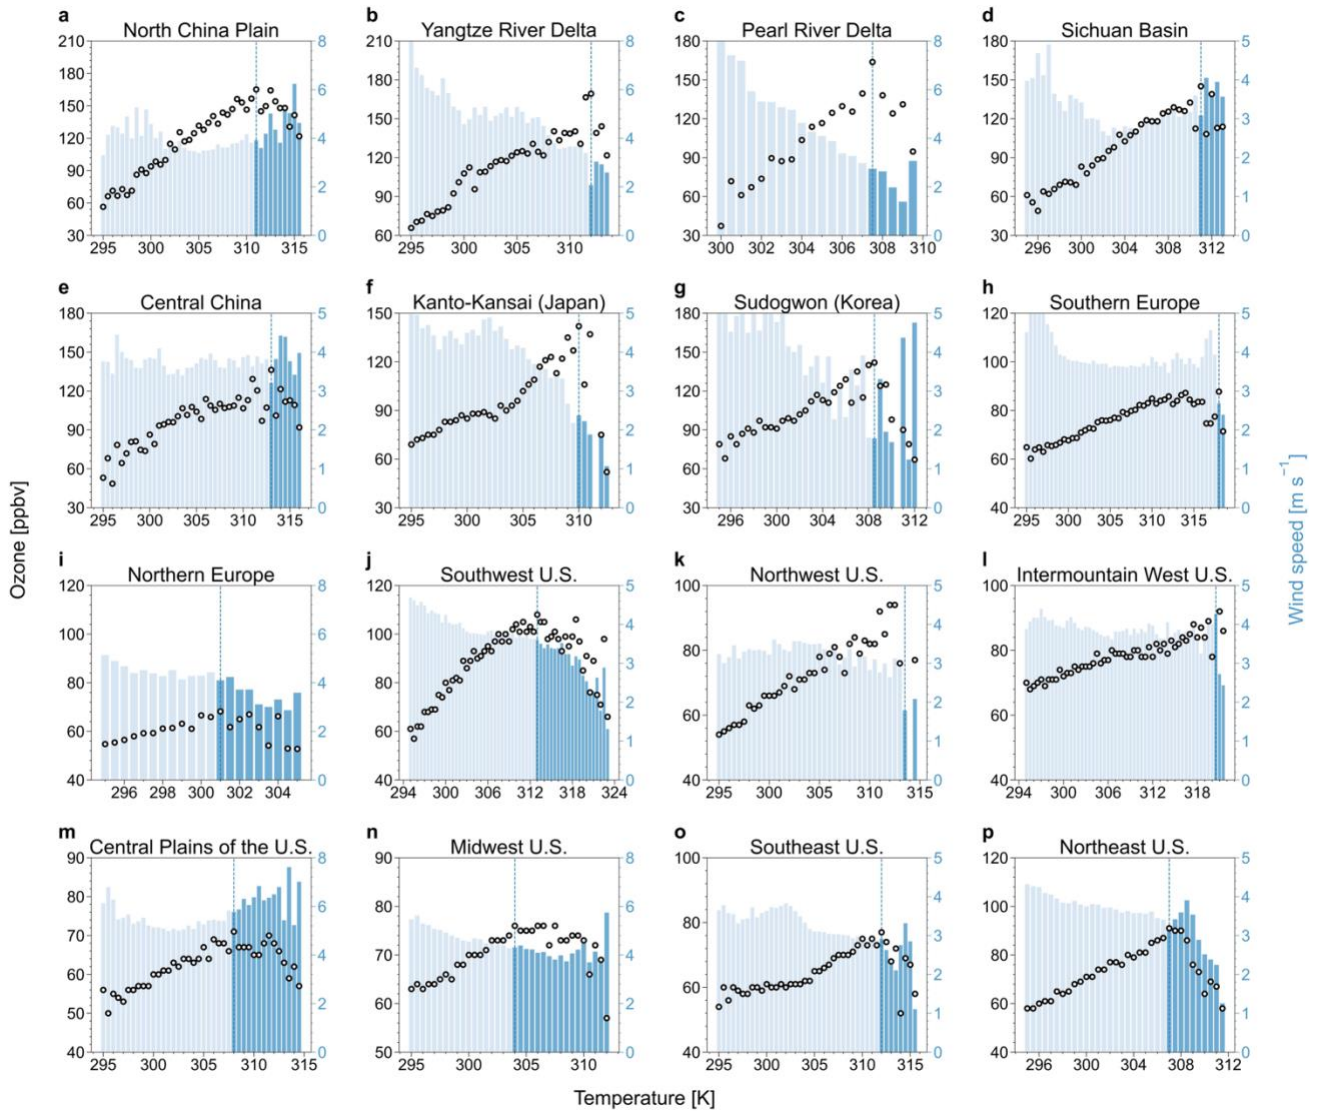

126

127

Supplementary Figure S9 | Same as Figure S8 but for surface wind speed.

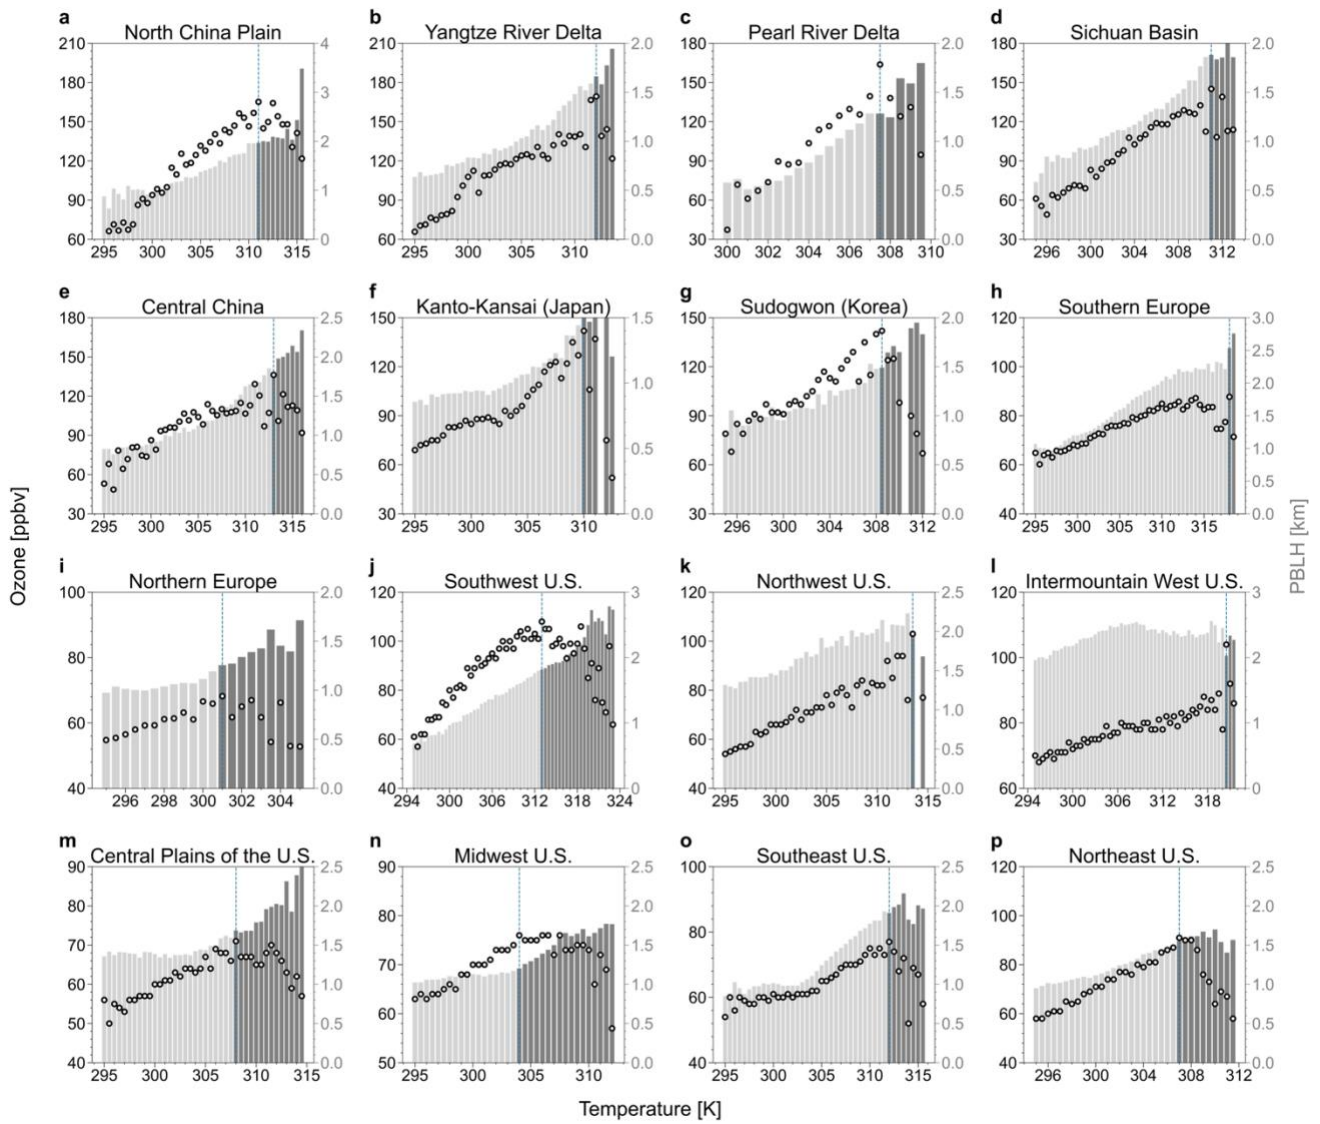

128

129

Supplementary Figure S10 | Same as Figure S8 but for Planetary Boundary Layer Height.

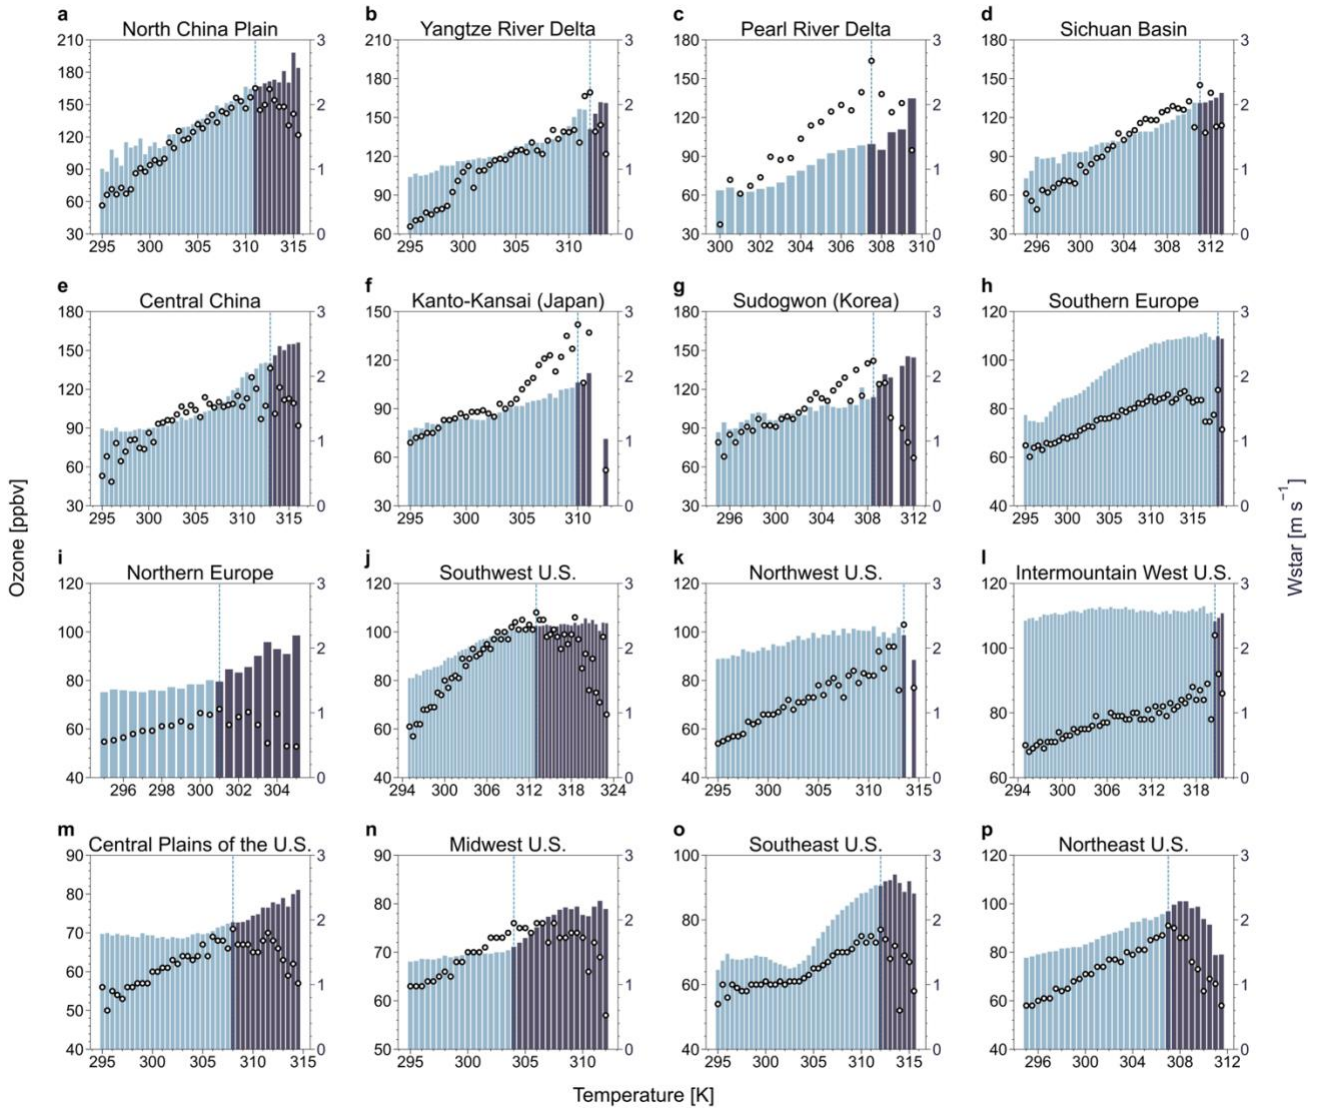

130

131

132

133

134

135

136

137

138

**Supplementary Figure S11 | Same as Figure S8 but for convective velocity scale. The convective velocity scale is a characteristic velocity that represents the typical strength of buoyancy-driven turbulence in the convective boundary layer. The magnitude of this velocity scale mainly depends on the strength of surface heat flux and the depth of the boundary layer. It is defined as  $w_* = \left(\frac{g}{T} z_i (\overline{wT})_0\right)^{1/3}$ , where  $g/T$  represents the buoyancy parameter for an ideal gas,  $z_i$  is the height of the convective layer (typically the height of the lowest inversion above the surface), and  $(\overline{wT})_0$  denotes the surface kinematic heat flux, or the virtual temperature flux in a moist atmosphere<sup>5,6</sup>.**

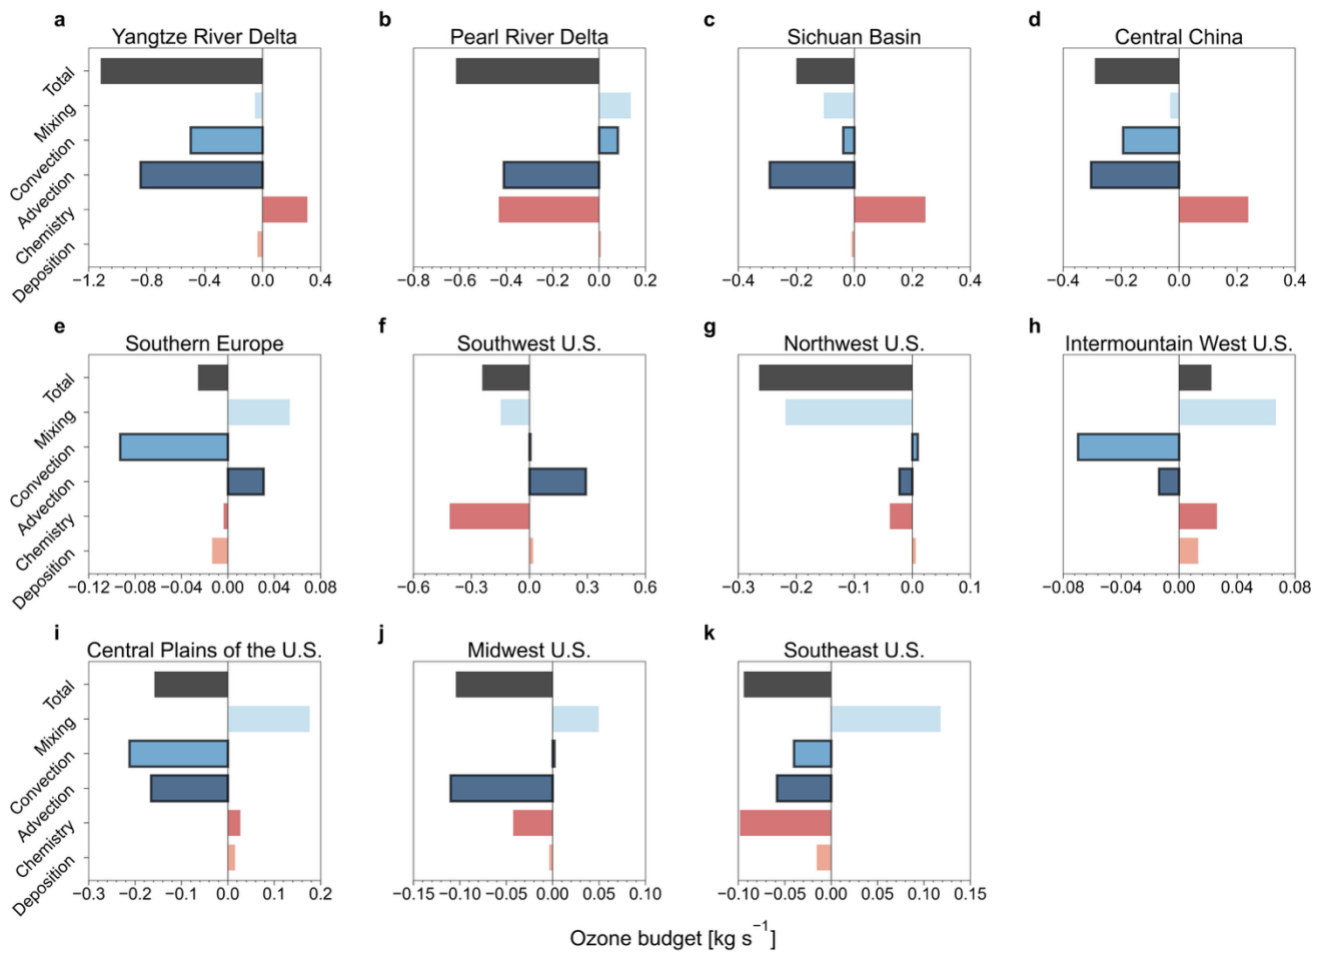

139  
140  
141  
142

**Supplementary Figure S12 | Same as Figure 2c but for key regions within China, Europe, and the United States.**

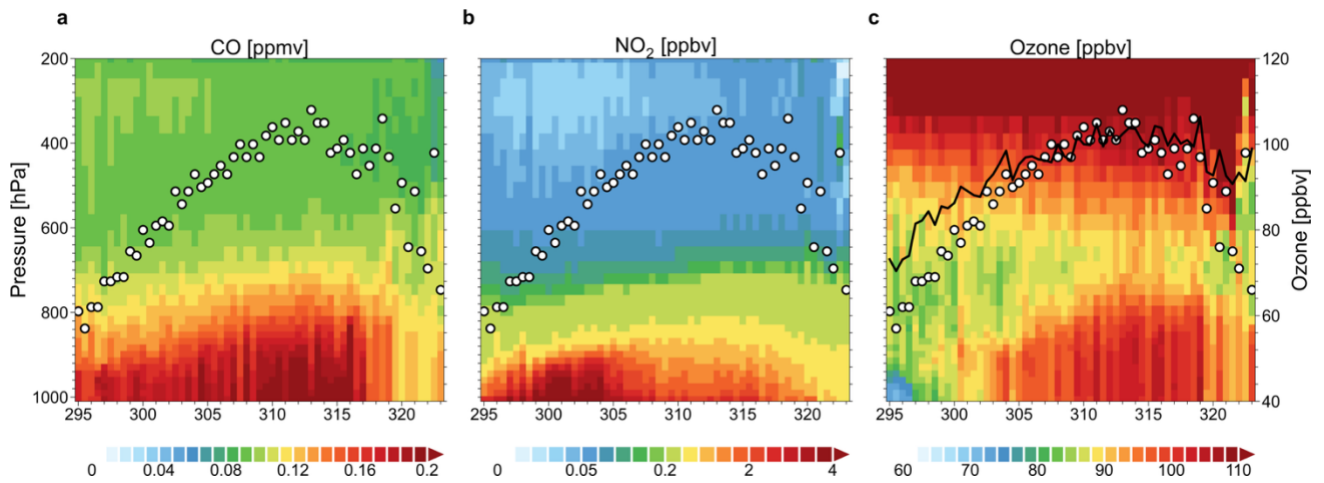

143

144 **Supplementary Figure S13 | Temperature-dependent vertical profiles of CO, NO<sub>2</sub>, and ozone**

145 **over the Southwest U.S. Colors show the GEOS-Chem simulated CO (a), NO<sub>2</sub> (b), and ozone (c)**

146 **as a function of pressure level and temperature. White circles indicate observed surface ozone**

147 **concentrations binned by temperature. The black line in the right panel shows the simulated**

148 **surface ozone–temperature relationship from the BASE simulation.**

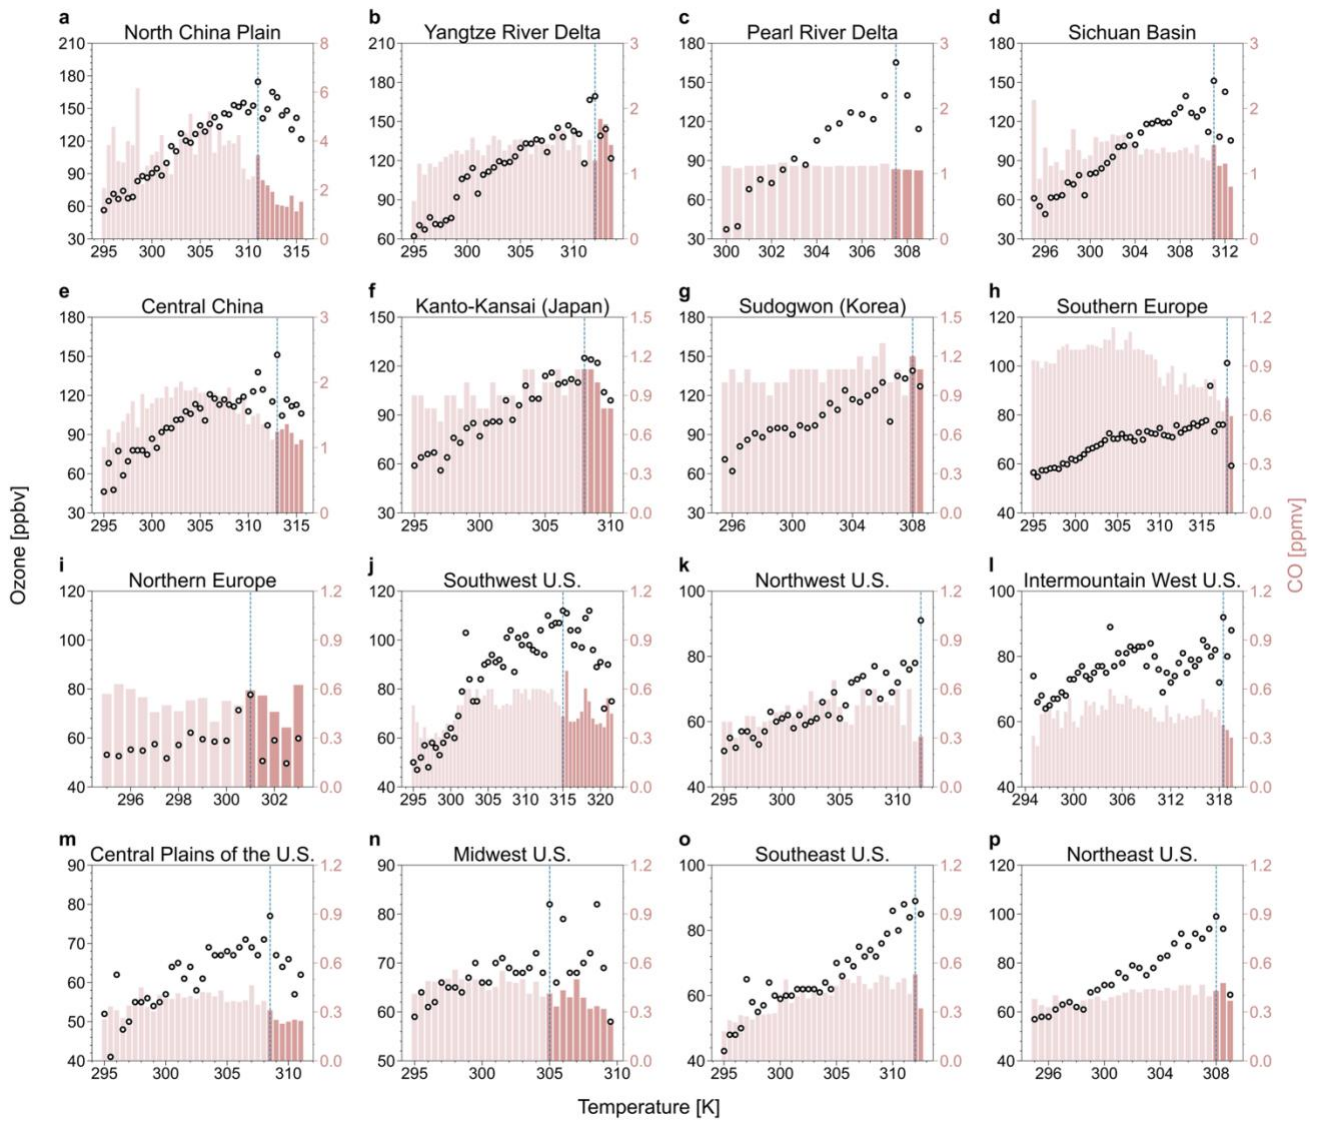

149

150 **Supplementary Figure S14 | Same as Figure S8 but for CO concentrations. Results are averaged**

151 **over sites with concurrent ozone and CO measurements that display ozone suppression.**

152

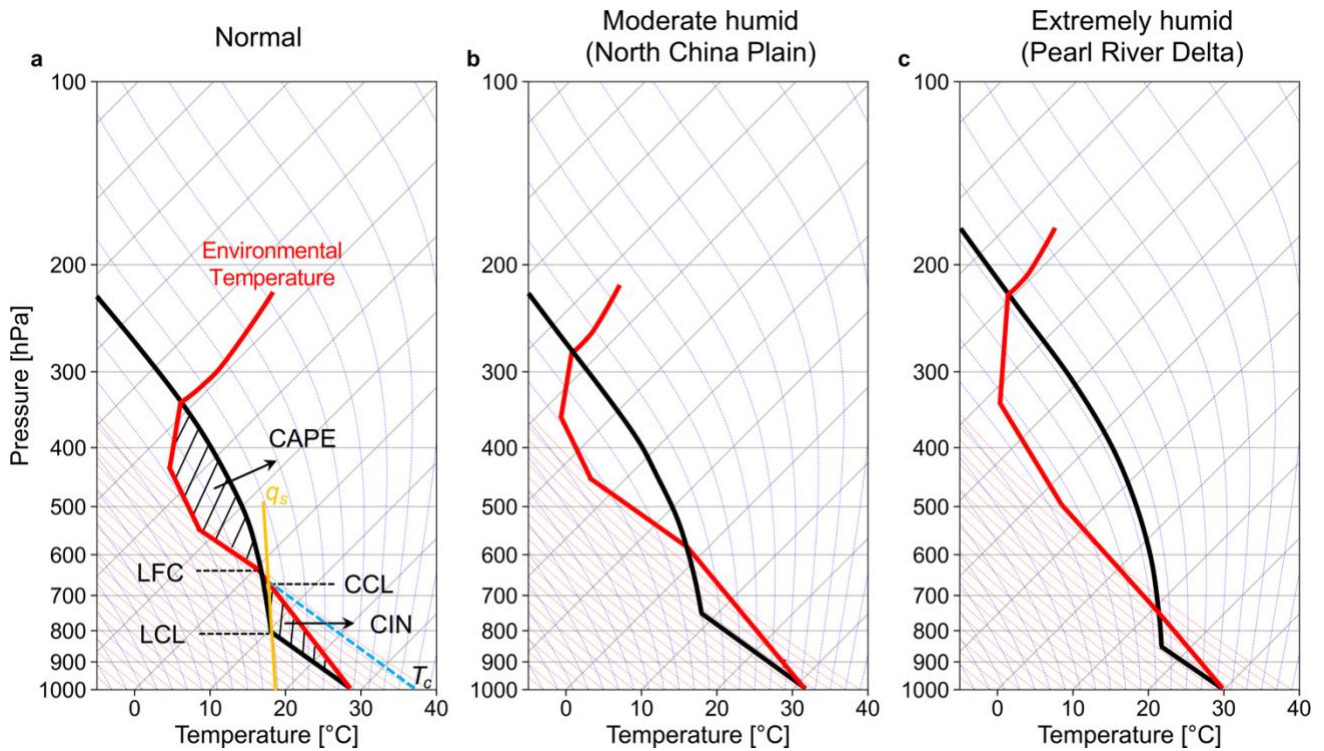

153

154

**Supplementary Figure S15 | Conceptual Skew-T Log-P diagrams for three atmospheric states:**

155

**(a) a “standard” diagram, (b) moderately moist conditions (RH~40-60%, such as the North**

156

**China Plain), and (c) wet conditions. The red line represents the environmental temperature**

157

**profile, while the black line indicates the temperature of an ascending air parcel following dry**

158

**and wet adiabatic processes. The shaded regions illustrate the convective available potential**

159

**energy and convective inhibition. The orange line indicates the saturation specific humidity.**

160

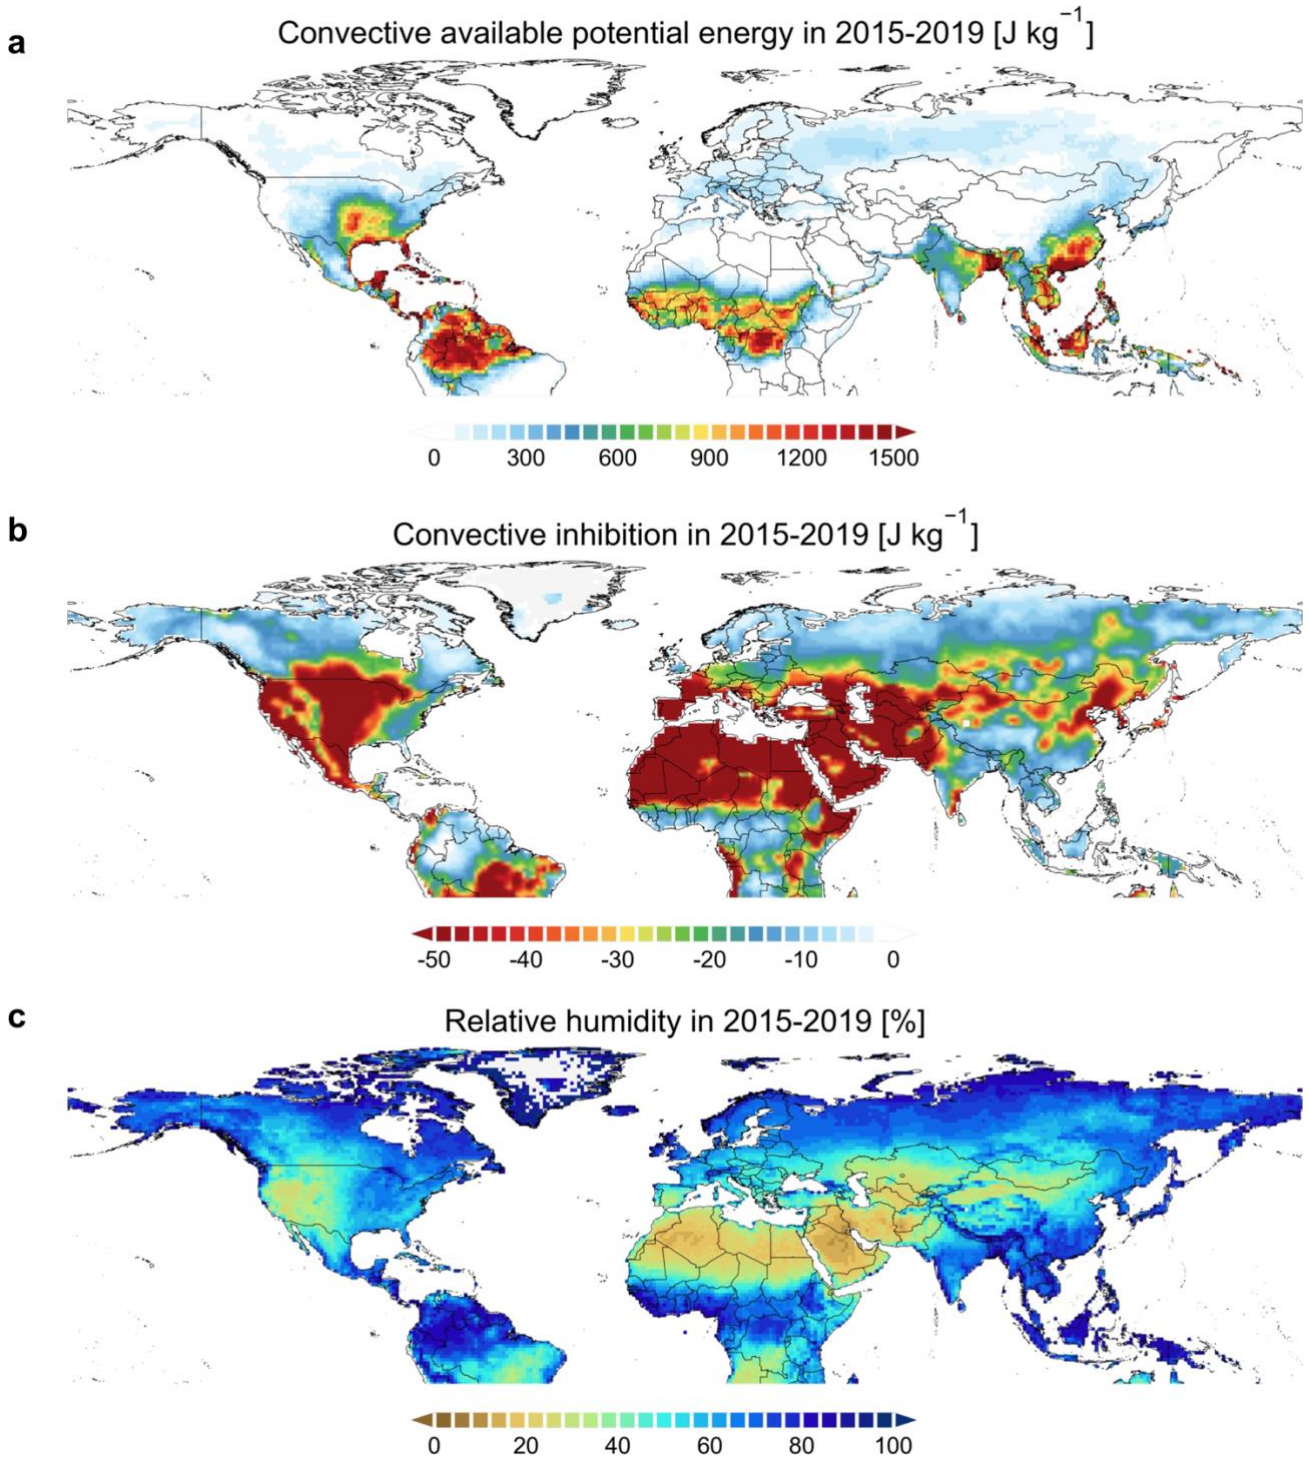

161

162

163

164

**Supplementary Figure S16 | Spatial distribution of summertime (JJA) mean (a) convective available potential energy, (b) convective inhibition, and (c) relative humidity during 2015–2019.**

Changes in convective temperature from 1980–1984 to 2015–2019 [K]

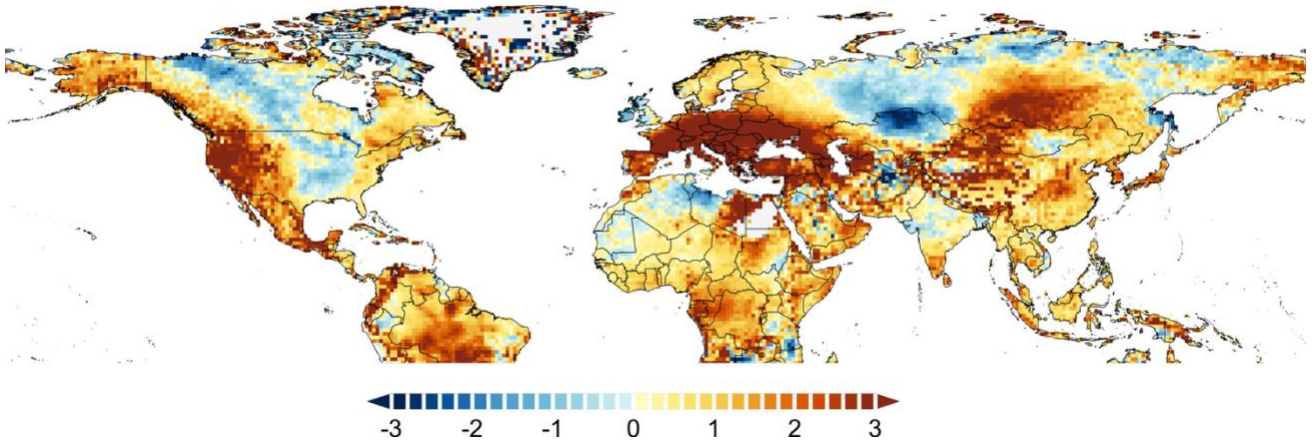

165

166

167

**Supplementary Figure S17 | Spatial distribution of summertime (JJA) changes in convective temperature (K) from 1980–1984 to 2015–2019.**

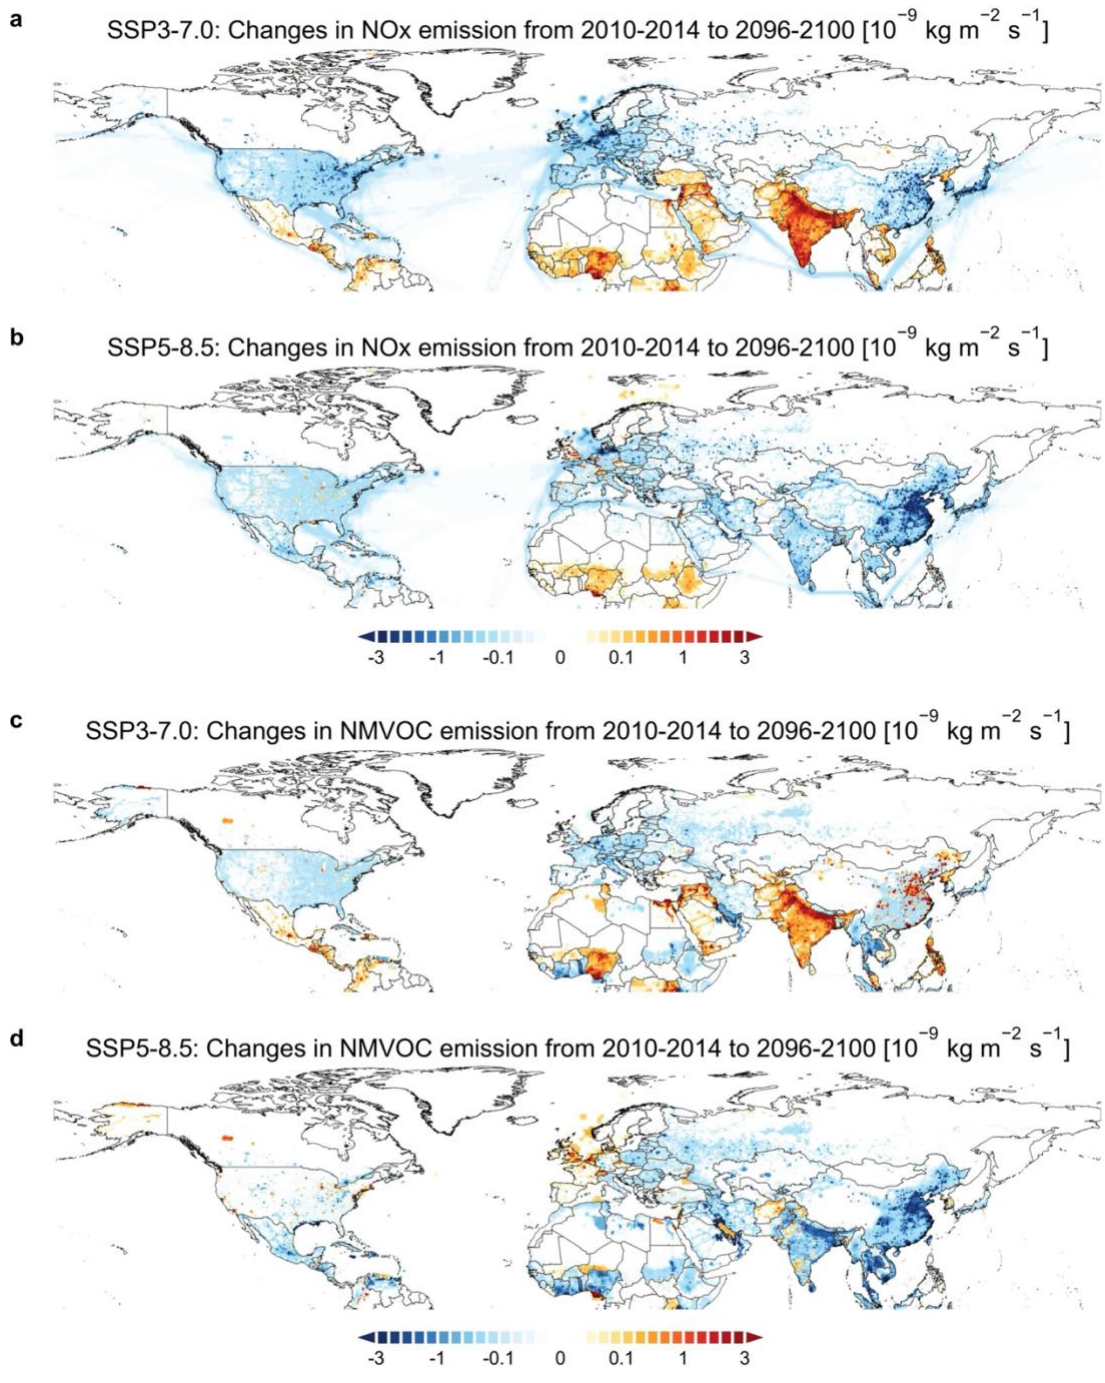

168

169 **Supplementary Figure S18 | Spatial distribution of changes in (a,b) NO<sub>x</sub> emission and (c,d)**

170 **NMVOCs emission from 2010-2014 to 2096–2100 under the SSP3-7.0 and SSP5-8.5.**

171 **Supplementary Table S1 | Information of hourly observations collected by**  
 172 **individual national monitoring networks.**

| Country       | Number of ozone sites | Number of CO sites | Source agent                                                          | Source URLs                                                                                                                 |
|---------------|-----------------------|--------------------|-----------------------------------------------------------------------|-----------------------------------------------------------------------------------------------------------------------------|
| China         | 2028                  | 2028               | China National Environmental Monitoring Center                        | <a href="http://106.37.208.233:20035/">http://106.37.208.233:20035/</a>                                                     |
| South Korea   | 554                   | 593                | Korean Ministry of Environment                                        | <a href="https://airkorea.or.kr/">https://airkorea.or.kr/</a>                                                               |
| Japan         | 899                   | 61                 | National Institute for Environmental Studies                          | <a href="https://tenbou.nies.go.jp/download/">https://tenbou.nies.go.jp/download/</a>                                       |
| United States | 1681                  | 426                | Environmental Protection Agency Air Quality System monitoring network | <a href="https://aqs.epa.gov/aqsweb/airdata/download_files.html">https://aqs.epa.gov/aqsweb/airdata/download_files.html</a> |
| Europe        | 2240                  | 1609               | European Environment Agency                                           | <a href="https://eeadmz1-downloads-webapp.azurewebsites.net/">https://eeadmz1-downloads-webapp.azurewebsites.net/</a>       |

173

174 **Supplementary Table S2 | Configurations of model simulations.**

| Cases      | Meteorology                                                  | Anthropogenic emissions                                                            | BVOC emissions |
|------------|--------------------------------------------------------------|------------------------------------------------------------------------------------|----------------|
| BASE       | 2015-2019                                                    | 2015-2019                                                                          | On             |
| FixTEMP    | 2015-2019 (with a normalized temperature field in the model) | 2015-2019                                                                          | On             |
| NoBVOC     | 2015-2019                                                    | 2015-2019                                                                          | Off            |
| AEMI30%OFF | 2015-2019                                                    | 2015-2019 (with 30% reduction in anthropogenic NO <sub>x</sub> and VOCs emissions) | On             |
| 1980MET    | 1980-1984                                                    | 2015-2019                                                                          | On             |

175

176 **Supplementary Table S3 | List of CMIP6 models analyzed in this study.**

| No. | Name of models | Frequency | Var        | Member     |          |          | Countries | Spatial    |
|-----|----------------|-----------|------------|------------|----------|----------|-----------|------------|
|     |                |           |            | Historical | SSP3-7.0 | SSP5-8.5 |           | Resolution |
| 1   | BCC-CSM2-MR    | 6hr       | ta / hus   | √          | /        | √        | China     | 160 × 320  |
| 2   | MIROC6         | 6hr       | ta / hus   | √          | /        | √        | Japan     | 128 × 256  |
| 3   | MPI-ESM1-2-LR  | 6hr       | ta / hus   | √          | /        | √        | Germany   | 96 × 192   |
| 4   | MRI-ESM2-0     | 6hr       | ta / hus   | √          | /        | √        | Japan     | 160 × 320  |
| 5   | NorESM2-LM     | 6hr       | ta / hus   | √          | /        | √        | Norway    | 96 × 144   |
| 6   | GFDL-ESM4      | 1hr       | sfo3 / tas | √          | √        | √        | USA       | 180 × 288  |

178 **References**

- 179 1. Wang, H. *et al.* Deciphering decadal urban ozone trends from historical records  
180 since 1980. *Natl. Sci. Rev.* **11**, (2024).
- 181 2. Steiner, A. L. *et al.* Observed suppression of ozone formation at extremely high  
182 temperatures due to chemical and biophysical feedbacks. *Proc. Natl. Acad. Sci.*  
183 *USA* **107**, 19685-19690, (2010).
- 184 3. Shen, L., Mickley, L. J. & Gilleland, E. Impact of increasing heat waves on U.S.  
185 ozone episodes in the 2050s: Results from a multimodel analysis using extreme  
186 value theory. *Geophys. Res. Lett.* **43**, 4017-4025, (2016).
- 187 4. Ning, G., Wardle, D. A. & Yim, S. H. L. Suppression of Ozone Formation at  
188 High Temperature in China: From Historical Observations to Future Projections.  
189 *Geophys. Res. Lett.* **49**, e2021GL097090, (2022).
- 190 5. Fan, Y., Li, Y., Wang, X. & Catalano, F. A New Convective Velocity Scale for  
191 Studying Diurnal Urban Heat Island Circulation. *J. Appl. Meteor. Climatol.* **55**,  
192 2151-2164, (2016).
- 193 6. Deardorff, J. W. Convective Velocity and Temperature Scales for the Unstable  
194 Planetary Boundary Layer and for Rayleigh Convection. *J. Atmos. Sci.* **27**,  
195 1211-1213, (1970).
